# Supplementary material for: Two tetranuclear 3d–4f heterometal complexes Mn2Ln2 (Ln = Dy, Gd): synthesis, structure, magnetism, and electrocatalytic reactivity for water oxidation
Source: Royal Society of Chemistry journal article supplement (doi:10.1039/c8nj00149a), 2018-01-01
Supplement: c8nj00149a1.pdf [file c8nj00149a1.pdf]

## Two tetranuclear 3d–4f heterometal complexes $\text{Mn}_2\text{Ln}_2$ ( $\text{Ln} = \text{Dy}, \text{Gd}$ ): synthesis, structure, magnetism, and electrocatalytic reactivity for water oxidation

Tian-Xiang Lan, Wei-Song Gao, Chang-Neng Chen, Hui-Sheng Wang, Mei Wang\* and Yu-hua Fan

Submitted to **New J. Chem.**

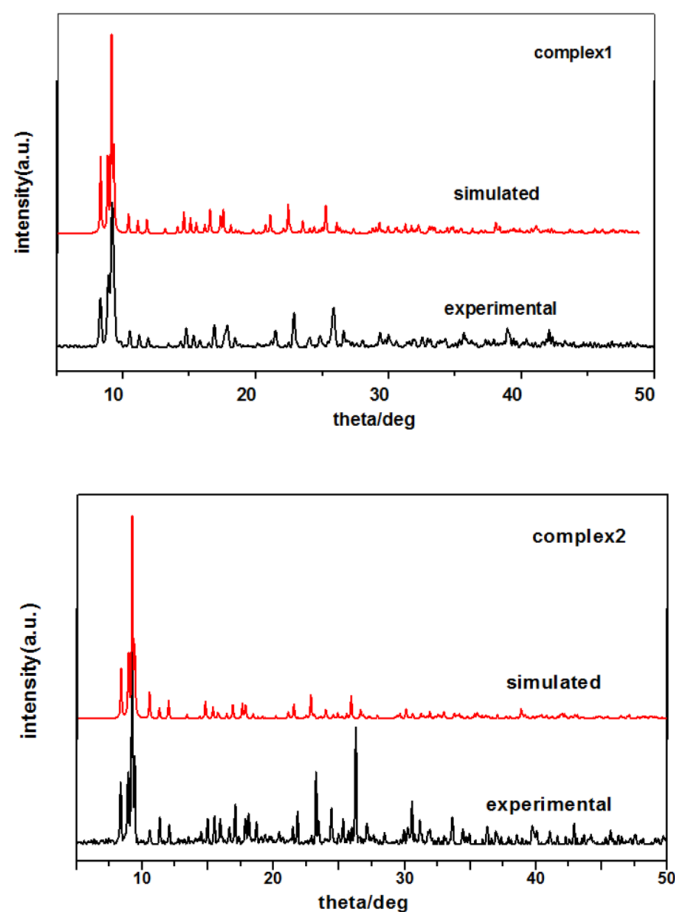

**Fig. S1** Experimental and simulated powder X-ray diffraction patterns of compounds **1** (top) and **2** (bottom).

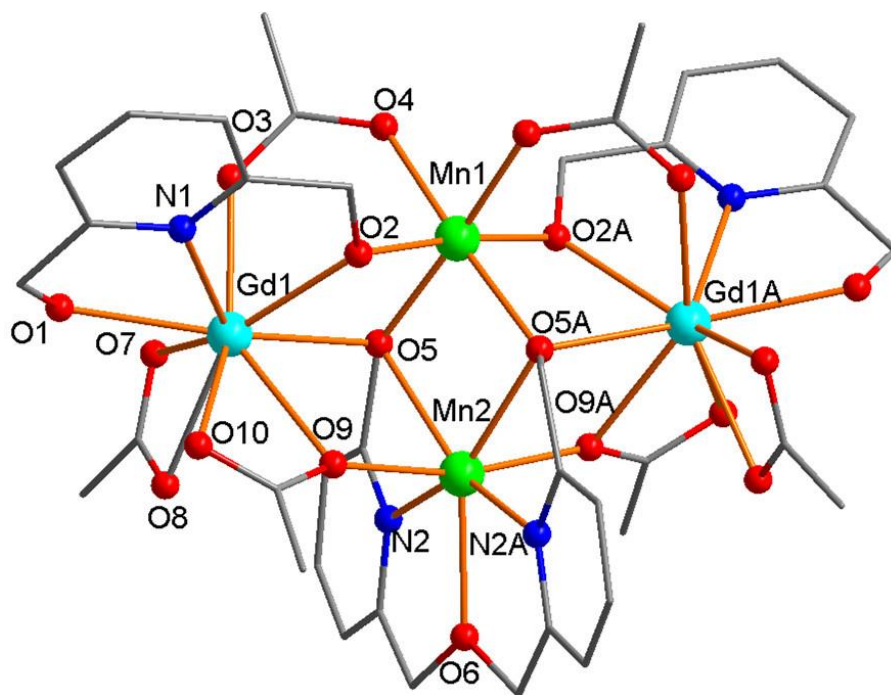

**Fig. S2** Crystal structure of complex **2**. Color code: Cyan, Gd; green, Mn; red, O; gray, C. Hydrogen atoms have been omitted for clarity.

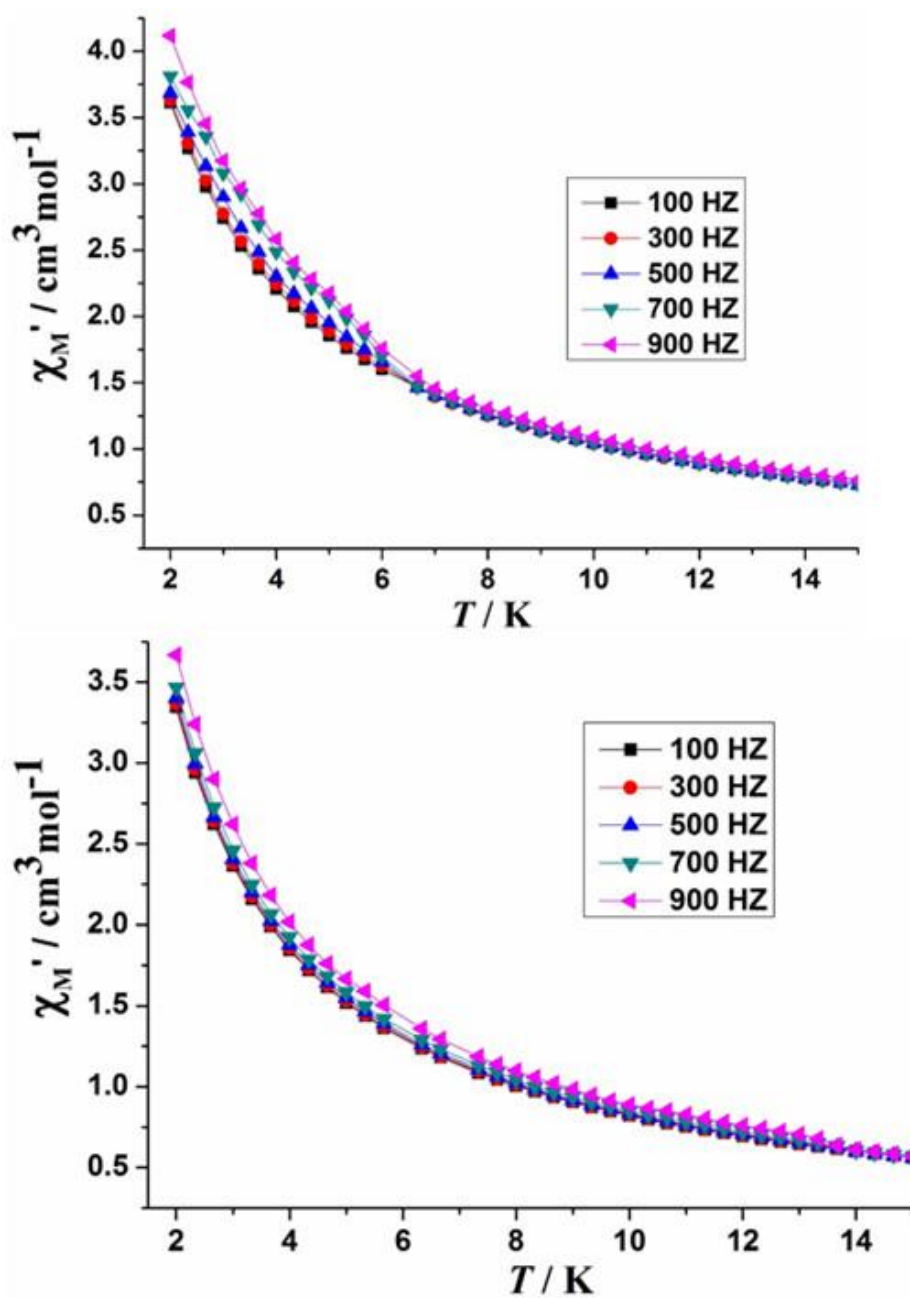

**Fig. S3** In-phase ( $\chi'_M$ ) AC susceptibility versus  $T$  for complex **1** (top) and complex **2** (bottom) measured in a 3.0 G AC field oscillating at the indicated frequencies.
